# Supplementary material
Source: PubMed Central journal article supplement (PMC7710601)
Supplement: NIHMS1630380-supplement-1.pdf [file NIHMS1630380-supplement-1.pdf]

**Pharmacological suppression of B7-H4 glycosylation restores antitumor immunity in immune-cold breast cancers**

Xinxin Song <sup>1\*</sup>, Zhuan Zhou <sup>1\*</sup>, Hongchun Li <sup>2,3\*</sup>, Yifan Xue <sup>4</sup>, Xinhua Lu <sup>4</sup>, Ivet Bahar <sup>2</sup>, Oliver Kepp <sup>5</sup>, Mien-Chie Hung <sup>6</sup>, Guido Kroemer <sup>5,7</sup> and Yong Wan <sup>1§</sup>

**Summary of Supplementary Materials:**

- 1. Supplementary Figures 1-8**
- 2. Supplementary Table 1**

1. Supplementary Figures 1-8

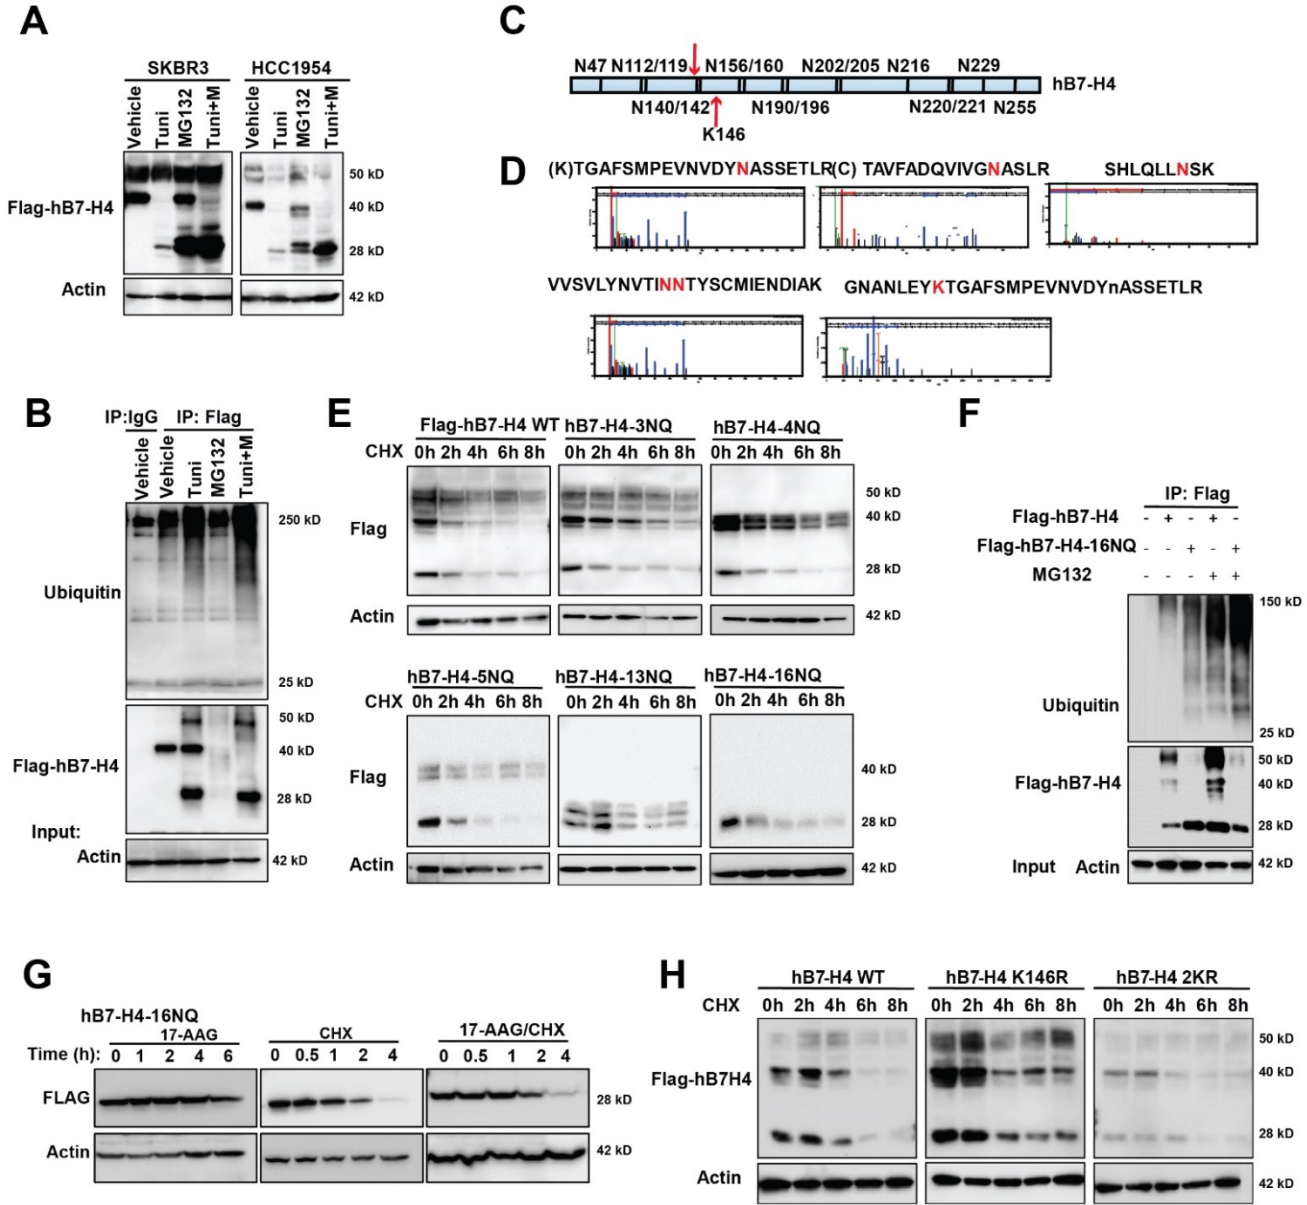

Supplementary Fig.1

**Supplementary Figure 1. Identification of B7-H4 glycosylation sites and ubiquitination sites by mass spectrometry and validation by mutagenesis analysis.**

(A) HCC1954 and SKBR3 stable expression of Flag-hB7-H4 cells were treated MG132 and/or tunicamycin followed by measuring Flag protein by western blotting. (B) MDA-MB-468 cells stable expression of Flag-hB7-H4 were treated MG132 and/or tunicamycin. Then Flag-hB7-H4 was immunoprecipitated by M2 beads followed by western blotting with antibody against ubiquitin. (C) Schematic diagram of B7-H4 showing the position of the glycosylation sites and ubiquitination sites. (D) Representative spectra from the mass spectrometry showing the glycosylation and ubiquitination sites. (E) 293T cells were transfected with Flag-hB7-H4 and mutant B7-H4 for 24 h. The protein turnover for both wildtype and mutants was measured with cycloheximide pulse-chase assay and western blotting. (F) Deglycosylation of B7-H4 enhances its ubiquitination. 293T cells were transfected with Flag-hB7-H4 wildtype and 16NQ mutant in the presence or absence of MG132. Flag-tagged proteins were then immunoprecipitated by anti-Flag-M2 beads followed by western blotting using antibody against ubiquitin. (G) 293T cells were transfected with FLAG-B7H4-16NQ and then treated with 10  $\mu$ M 17-AAG (Left panel), 100  $\mu$ g/ml CHX (middle panel), or pre-treated 10  $\mu$ M 17-AAG for 2h and then pulse-chase with 100  $\mu$ g/ml CHX (17-AAG/CHX, right panel) for indicated hours. Cell lysates were collected at indicated time point the expression of Flag-hB7-H4-16NQ was detected by anti-FLAG antibody. (H) 293T cells were transfected with FlagB7-H4, Flag-hB7-H4-K146R and Flag-hB7-H4-2KR for 24 h. The protein turnover for both wild-type and mutants was measured with cycloheximide pulse-chase assay and western blotting.

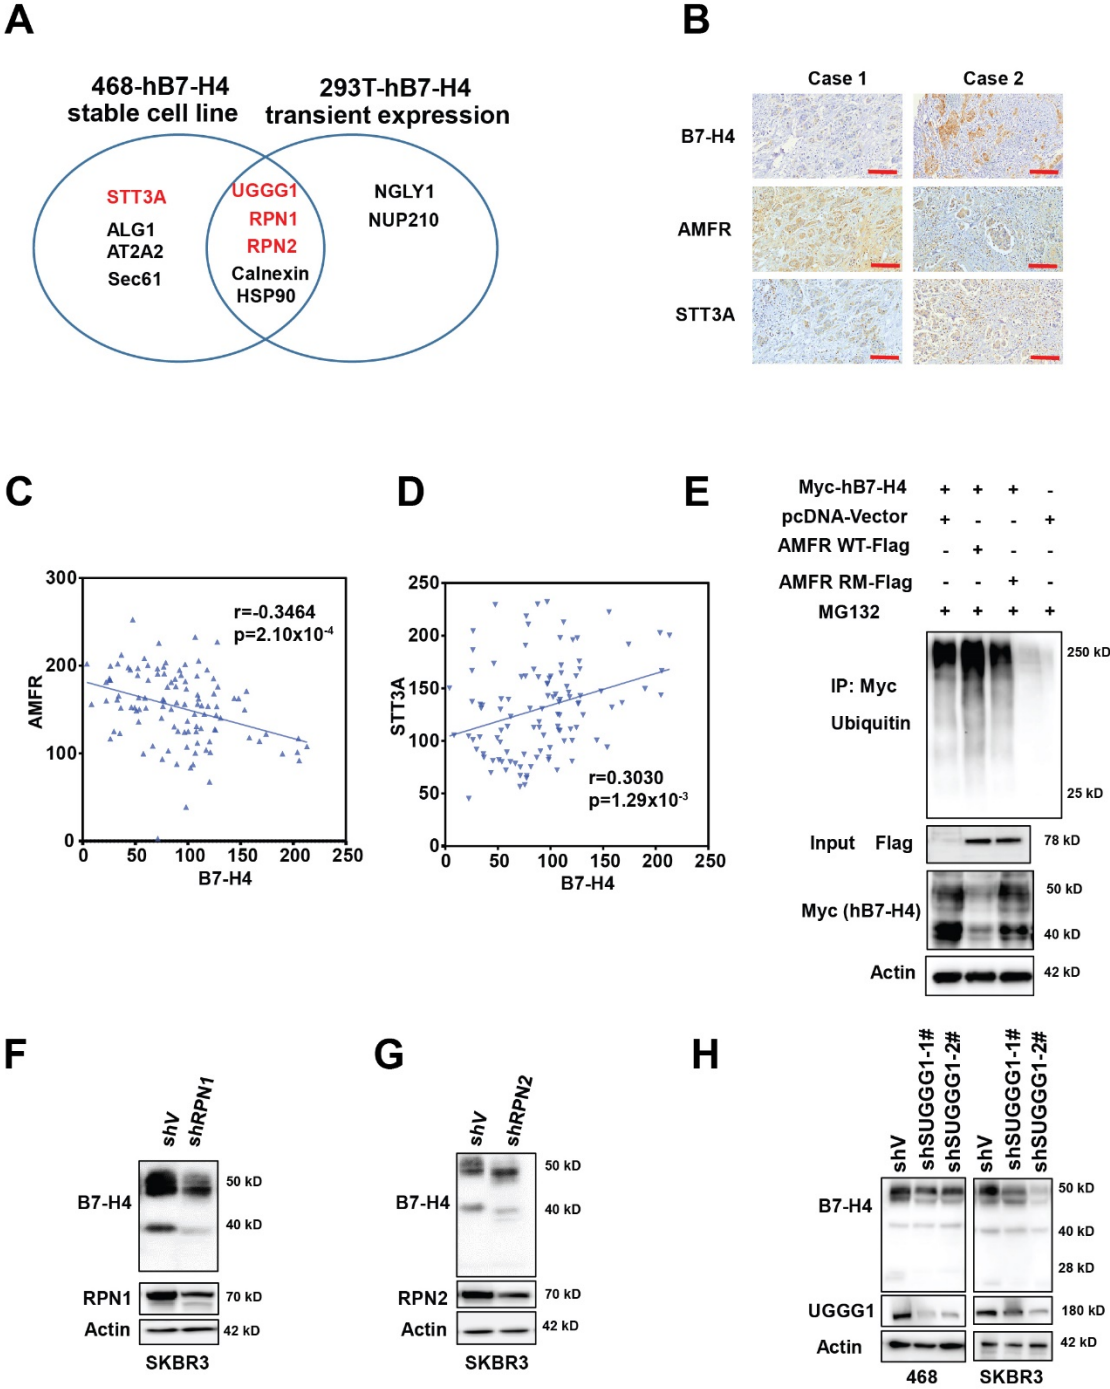

Supplementary Fig.2

**Supplementary Figure 2. The identification and validation of ubiquitin E3 ligase and glycosyltransferase of B7-H4**

(A) The Venn diagram of ER-associated B7-H4 binding partners from the mass spectrometry based on MDA-MB-468 with stable expression of Flag-hB7-H4 and 293T cells with transient expression of Flag-hB7-H4. (B) Representative paired immunohistochemistry staining of B7-H4, AMFR and STT3A. Scale, 200  $\mu$ m. (C-D) Statistical analysis of immunohistochemistry staining of the tissue array shows that B7-H4 expression is negatively correlated with AMFR expression in breast cancer ( $r = 0.3464$ ,  $p = 2.1 \times 10^{-4}$ ) (C), and positively correlated with STT3A expression in breast cancer ( $r = 0.3030$ ,  $p = 1.29 \times 10^{-3}$ ) (D). (E) 293T cells were transfected with Myc-hB7-H4 and Flag-AMFR wildtype or RM (RING-domain mutation C356G/H361A) in the presence or absence of the proteasome inhibitor MG132. Then B7-H4-Myc was immunoprecipitated followed by western blotting with antibody against ubiquitin. (F-G) The stable knockdown RPN1 (F), RPN2 (G) and UGGG1(H) of MDA-MB-468 or SKBR3 cells were established. The indicated proteins were examined by western blotting.

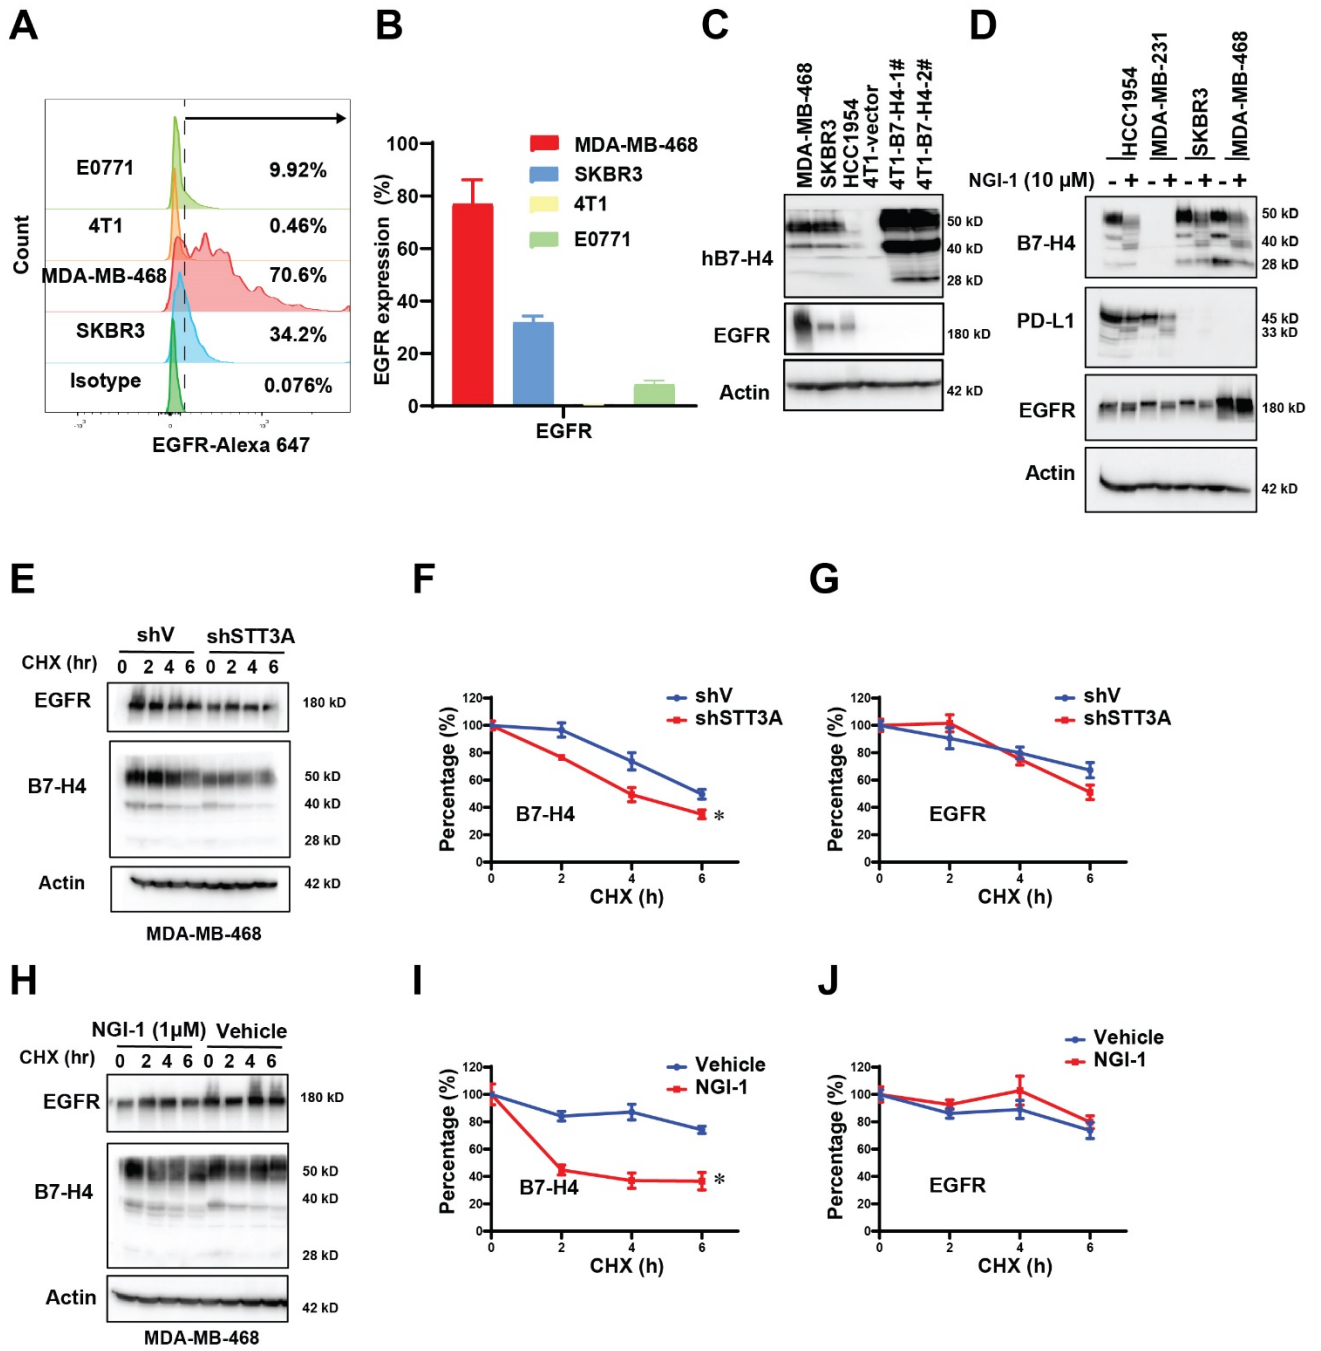

Supplementary Fig.3

**Supplementary Figure 3. The comparison of the expression and the stability of EGFR with B7-H4 in breast cancer cells.**

**(A)** The level of EGFR expression in MDA-MB-468, SKBR3, 4T1 cells and E0771 cells was examined by Flow cytometry. **(B)** Quantification of the expression of EGFR from A is shown. **(C)** The expression of EGFR and B7-H4 in MDA-MB-468, SKBR3, HCC1954, 4T1-vector and 4T1B7-H4 cells was examined by Flow cytometry. **(D)** HCC1954, MDA-MB-231, SKBR3, and MDAMB-468 cells were treated with NGI-1 for 24 hr followed by western blotting with B7-H4, PD-L1 and EGFR. Figure Pulse-chase analysis for MDA-MB-468 cells with STT3A knockdown or NGI-1 pretreatment. **(E)** MDA-MB-468-shVector and -shSTT3A cells were treated with 100 µg/ml cycloheximide at the indicated time point. B7-H4 levels and EGFR were measured by western blotting. Actin was used as a loading control. **(F and G)** The quantification of B7-H4 protein and EGFR was performed using ImageLab. **(H)** MDA-MB-468 cells were pretreated with 1 µM NGI-1 for 24 hr followed by pulse-chase with cycloheximide at the indicated time point. **(I and J)** B7-H4 levels and EGFR were measured by western blotting. The quantification of B7-H4 protein and EGFR were performed using ImageLab.

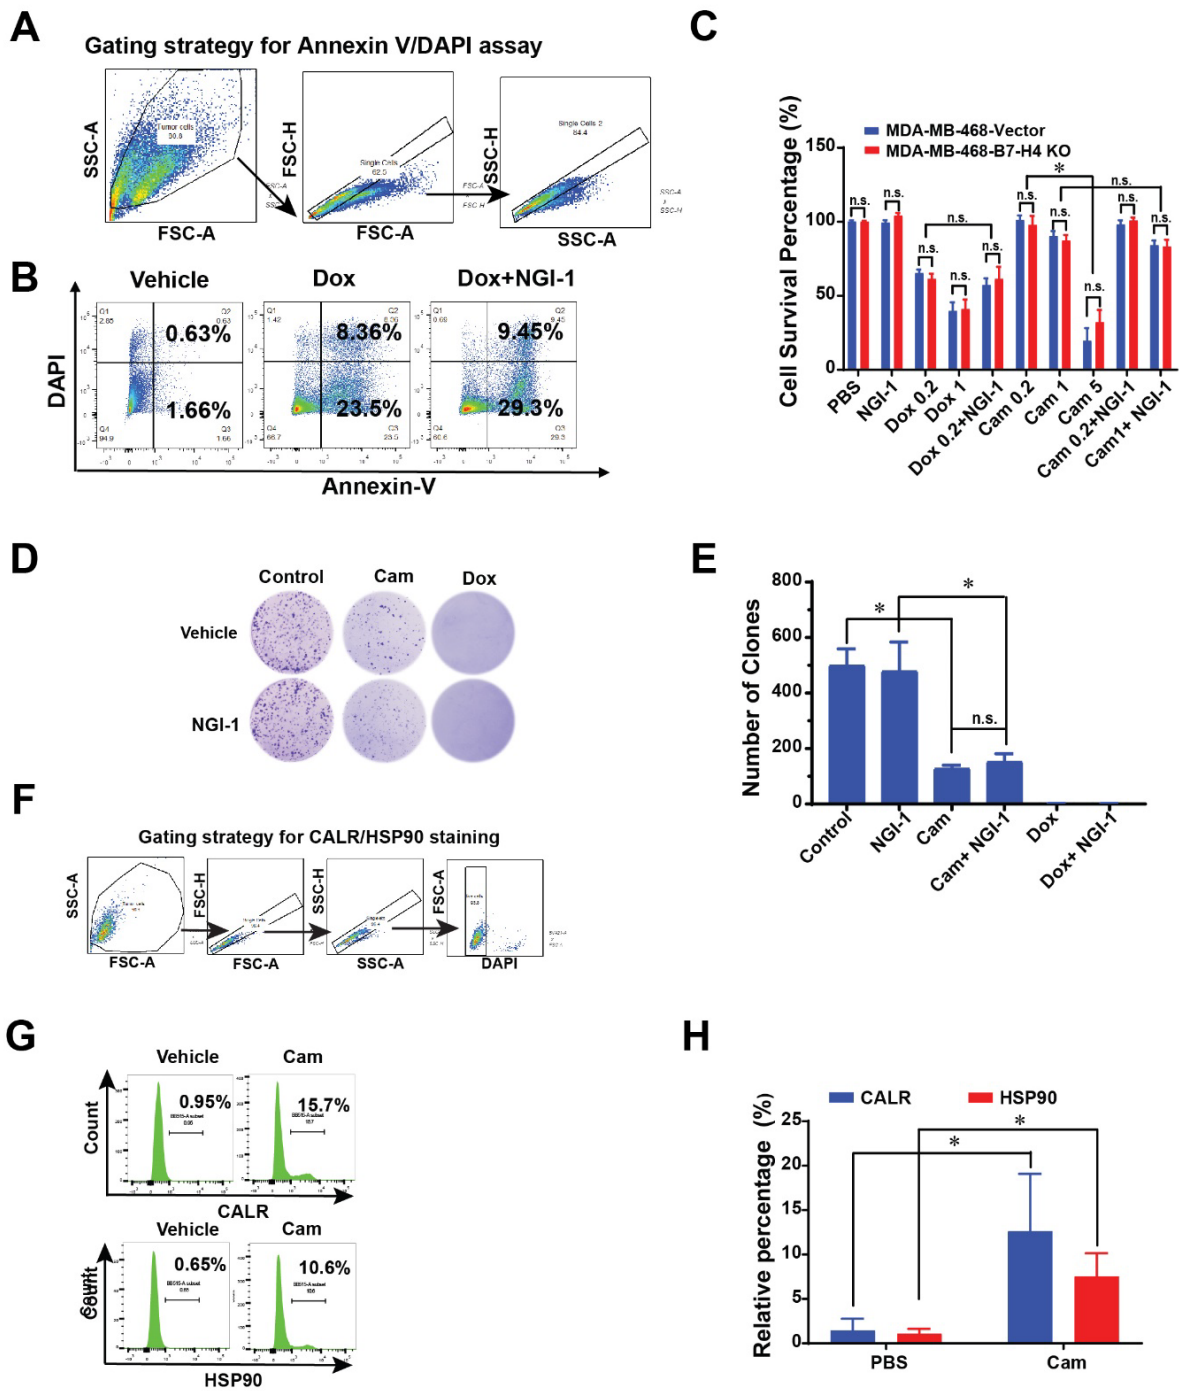

Supplementary Fig.4



**Supplementary Figure 4. The effect of doxorubicin, camsirubicin and NGI-1 on cell death and DAMP molecules induction by camsirubicin in vitro.**

**(A)** The gating strategy for Annexin V/DAPI staining. **(B)** MDA-MB-468 cells were treated with 10  $\mu$ M doxorubicin in the presence or absence of 10  $\mu$ M NGI-1 for 24 h. Annexin V/DAPI staining flow cytometry assay was measured. **(C)** MDA-MB-468-vector and MDA-MB-468-B7-H4 knockout cells were treated with doxorubicin (dox, 0.2-1  $\mu$ M) or camsirubicin (Cam, 0.2-5  $\mu$ M), or NGI-1 (10  $\mu$ M) for 3 days, cell viability was measured with CCK8 assay. **(D)** MDA-MB-468 cells were treated with NGI-1 (10  $\mu$ M) for 24 hr, 5  $\mu$ M dox for 30 min or 5  $\mu$ M cam for 30 min followed by plating 1000 cells for colony formation for 2 weeks. Representative images are shown. **(E)** Quantification of numbers of colonies from D is shown. **(F)** The gating strategy of CALR or HSP90 staining. After the debris and doublets removal, the live cells were gated based on DAPI negative cells. **(G)** MDAMB-468 cells were treated with 10  $\mu$ M camsirubicin for 24 hr. Flow cytometry on the cell surface of CALR and HSP90 were performed in MDA-MB-468. **(H)** Quantification of the relative percentage of CALR and HSP90 from D in camsirubicin-treated cells.

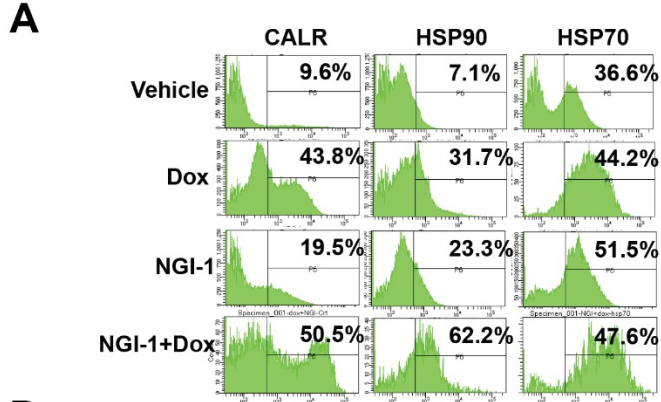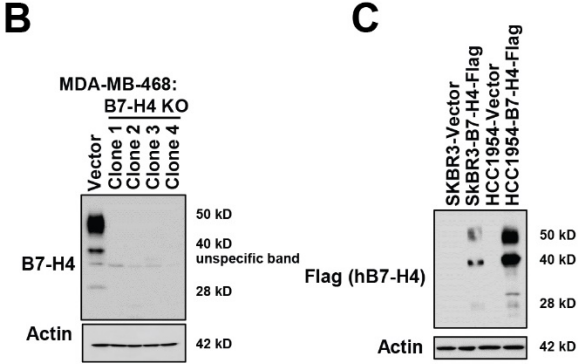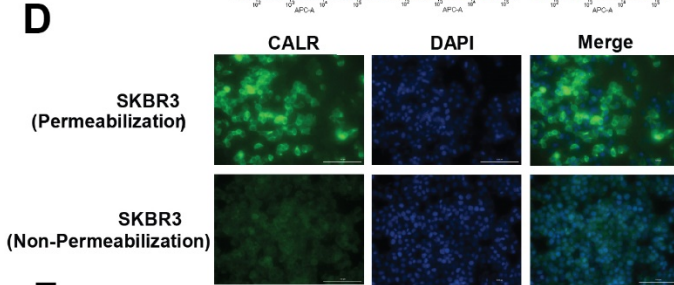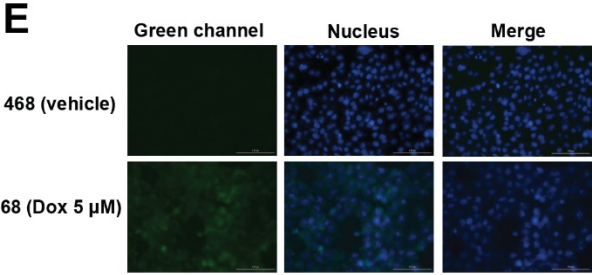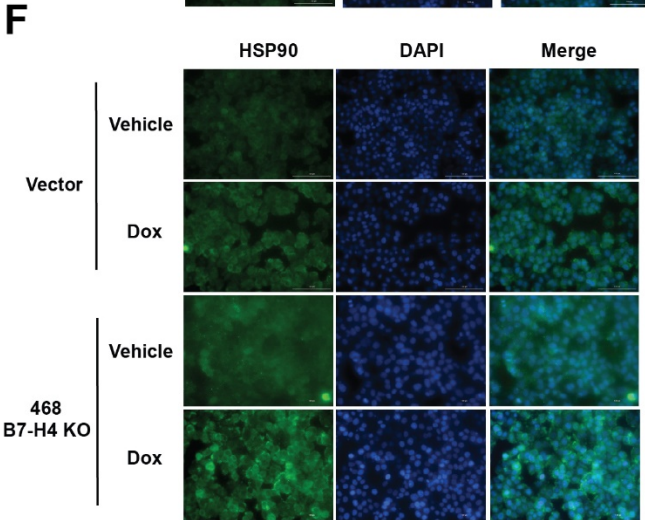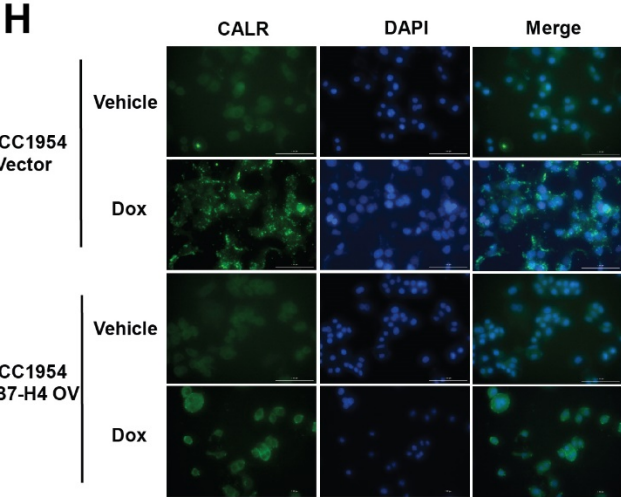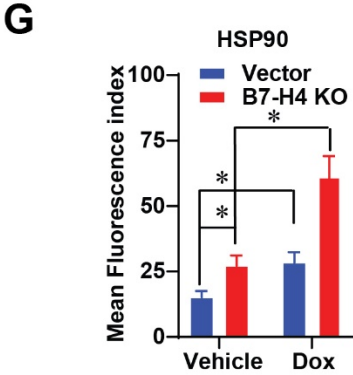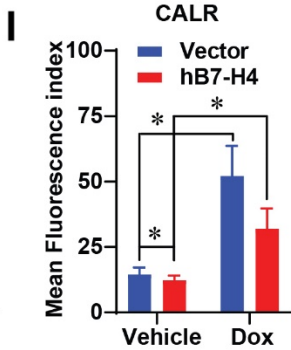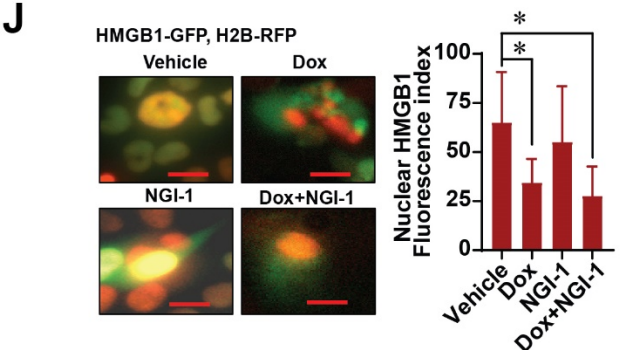

Supplementary Fig.5

**Supplementary Figure 5. B7-H4 inhibits doxorubicin-induced membrane expression of damage associated molecular patterns (DAMP) molecules**

(A) Representative flow cytometry plots showing membrane CALR, HSP70 and HSP90 of SKBR3 cells treated with doxorubicin and/or NGI-1 for 24 h. (B) The vector control and B7-H4 knockout clones were established in MDA-MB-468 cells. (C) Stable expression of Flag-hB7-H4 was established in SKBR3 and HCC1954 cells. (D) Immunostaining of the immunogenic cell death marker CALR of SKBR3 cells w/o permeabilization was performed. Scale = 100  $\mu$ m. (E) The green fluorescence of MDA-MB-468 cells treated 5  $\mu$ M doxorubicin at 24 hr. Scale = 100  $\mu$ m. (F) MDAMB-468-vector and MDA-MB-468-B7-H4 knockout cells were treated with 5  $\mu$ M doxorubicin for 24 h. Immunostaining of the immunogenic cell death marker HSP90 on the cell surface were performed. Scale = 100  $\mu$ m. (G) Mean fluorescence index of HSP90 was quantified by ImageJ from F. (H) Membrane immunostaining of the immunogenic cell death marker CALR on HCC1954vector, and HCC1954 B7-H4 overexpressed cells were performed. Scale = 100  $\mu$ m. (I) Mean fluorescence index of CALR was quantified by ImageJ from H. (J) Human osteosarcoma U2OS cell stable co-expressing HMGB1-GFP/H2B-RFP were treated with 5  $\mu$ M doxorubicin and/or 10  $\mu$ M NGI-1 followed by the assessment of HMGB1. Representative images are shown. Scale = 10  $\mu$ m. Nuclear HMGB1 Fluorescence index was quantified by ImageJ.

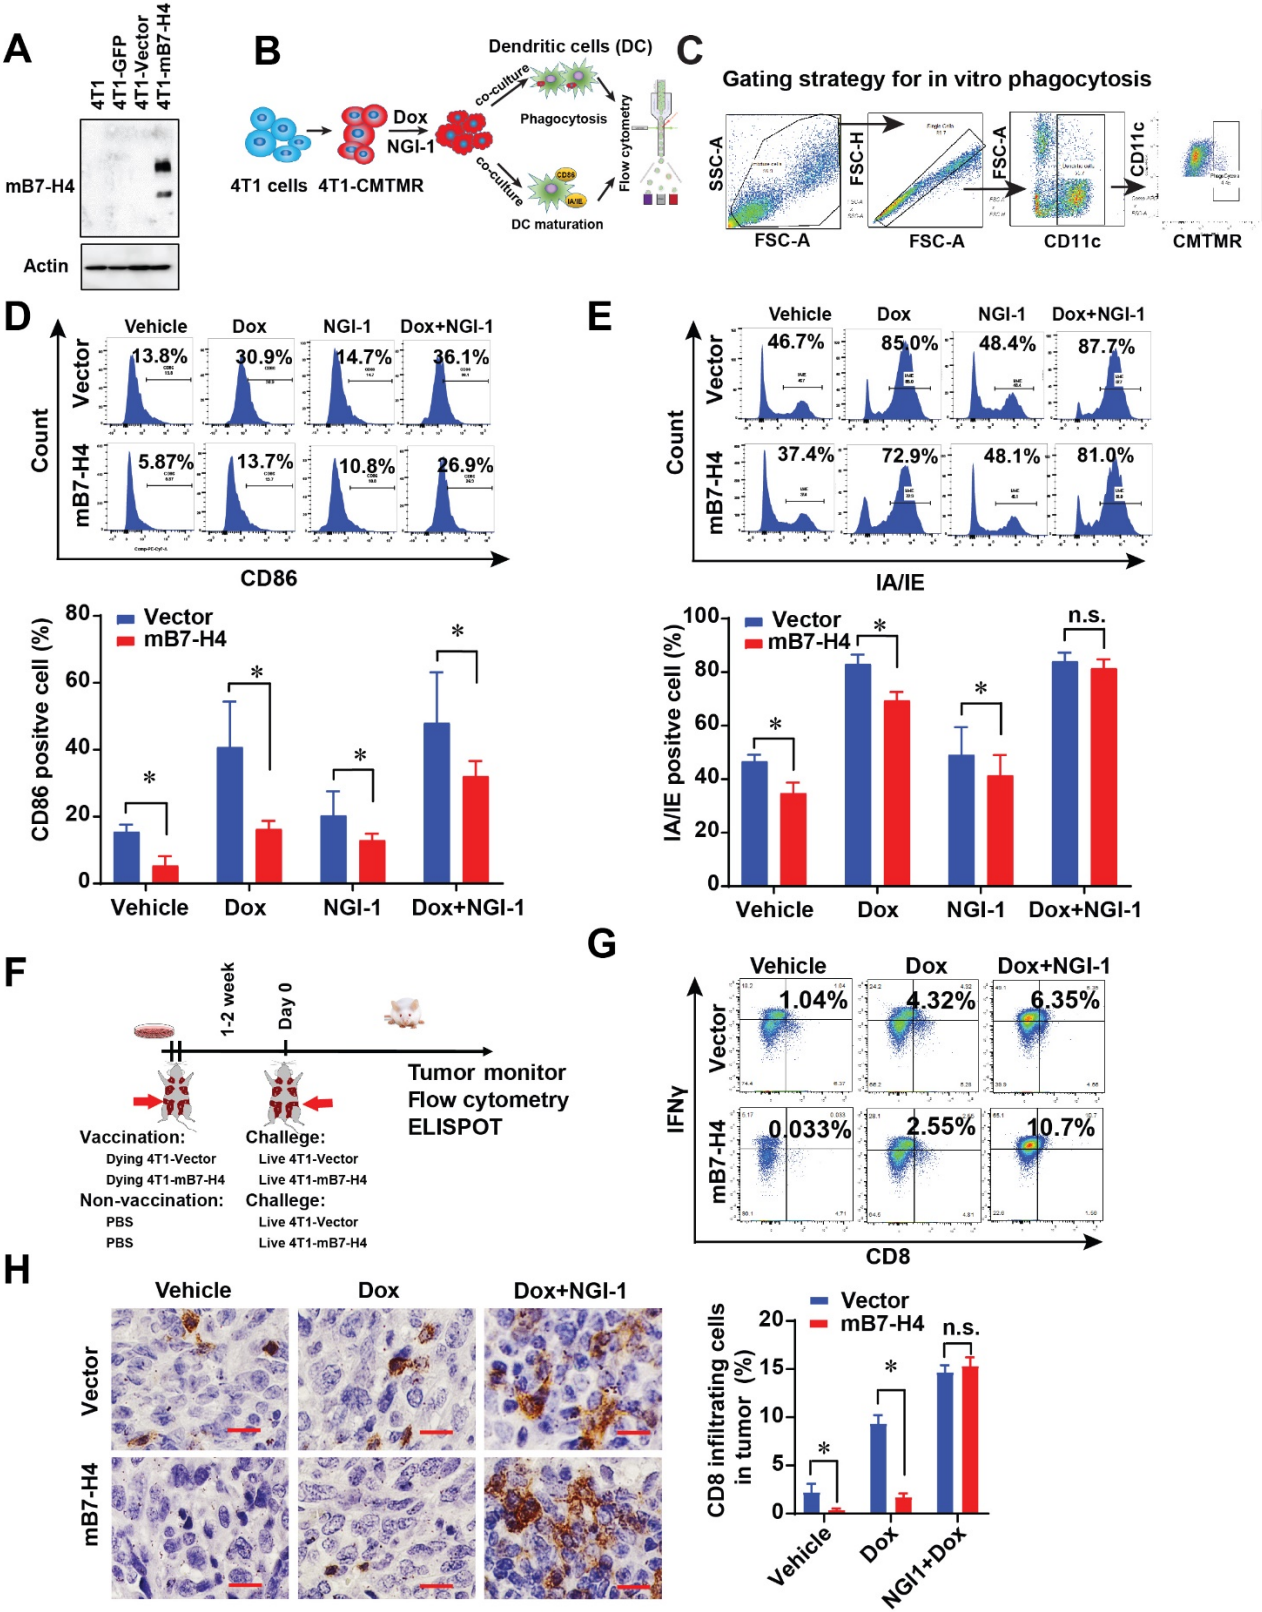

Supplementary Fig.6

**Supplementary Figure 6. B7-H4 inhibits DC phagocytosis and maturation, IFN $\gamma$  production and CD8 infiltration induced by doxorubicin and NGI-1-treated cancer cells.**

**(A)** The expression of mouse B7-H4 in 4T1, 4T1-GFP, 4T1-Vector and 4T1-mB7-H4 cell lines. **(B)** Schematic diagram of in vitro phagocytosis and mouse DCs maturation assay. **(C)** Representative flow cytometry plots illustrating the typical gating strategy of in vitro phagocytosis. The DCs were gated on CD11c<sup>+</sup>. The phagocytosis is assessed as the frequency of CD11c<sup>+</sup>CMTMR<sup>+</sup> cells events out of total CD11c<sup>+</sup> cells. Numbers indicate frequency of events out of the previous gate. **(D-E)** DCs maturation assay. 4T1-vector and 4T1-B7-H4 cells were treated with doxorubicin (25  $\mu$ M) or NGI-1 (10  $\mu$ M) for 24 hours and co-cultured with the purified CD11c positive cells for 24 hours at a ratio of 1: 1, and then subjected to flow cytometry. The level of CD86 **(D)** and I-A/I-E **(E)** were measured in CD11c<sup>+</sup> cells. Representative plots are shown. Quantification of CD86<sup>+</sup> and I-A/I-E<sup>+</sup> cells is shown. **(F)** Schematic diagram of the therapeutic strategy of in vivo vaccination assay. 4T1-vector or 4T1-B7-H4 cells were treated with doxorubicin and/or NGI-1 for 24 h followed by orthotopically injection into the right mammary gland of the BALB/c mice. PBS was used as the non-vaccination. One or two weeks later, all mice were rechallenged with live 4T1-vector or 4T1-B7-H4 cells in the left mammary gland. **(G)** On day 28, mouse spleens were harvested and followed by flow cytometry of staining IFN $\gamma$  and CD8. The representative images are shown. **(H)** Tumor tissues were subjected to the immunohistochemistry staining with anti-CD8 antibody. The representative images are shown (scale, 20  $\mu$ m). Quantification of CD8<sup>+</sup> infiltrating cells is shown.

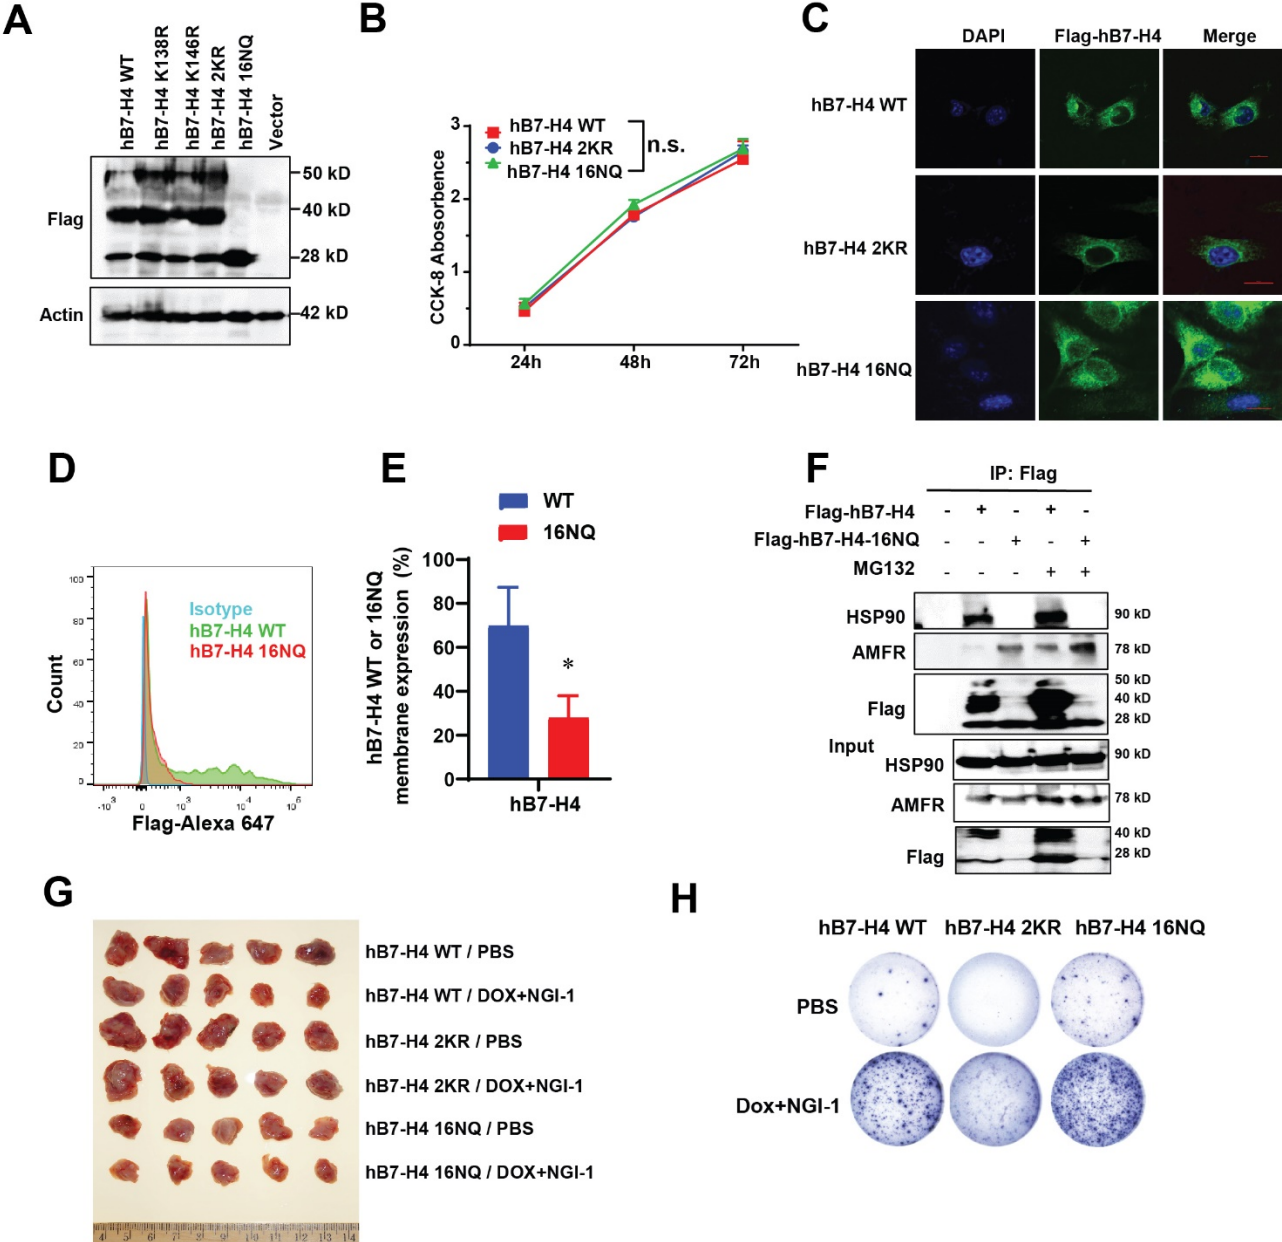

Supplementary Fig.7



**Supplementary Figure 7. The comparisons of B7-H4 WT and mutants in proliferation, tumorigenesis, localization, membrane expression, and IFN $\gamma$  production.**

(A) 4T1 stably cell lines expressing Flag-tagged human B7-H4-WT, K138R, K146R, 2KR, 16NQ and vector were established, and validated by western blot using specific Flag antibody. (B) The proliferation assay of 4T1-B7-H4, 2KR and 16NQ cells was performed. (C) Immunofluorescence staining of the Flag-tagged B7-H4, 2KR and 16NQ was performed followed by confocal microscope. (D) The membrane expression of Flag-hB7-H4-WT and Flag-hB7-H4-16NQ. MDA-MB468 Flag-hB7-H4-WT and Flag-hB7-H4-16NQ cells were examined by flow cytometry with anti-Flag antibody followed by anti-Rabbit Alexa 647. The representative images were shown. (E) The quantification of the expression of B7-H4 WT or 16NQ in MDA-MB-468 Flag-hB7-H4-WT and FlagB7-H4-16NQ cells were shown. (F) 293T cells were transfected with Flag-hB7-H4 or Flag-hB7-H416NQ for 48 h followed by 10  $\mu$ M MG132 for 8 h. Then Flag-hB7-H4 was immunoprecipitated by anti-Flag beads. The expression of HSP90, AMFR and Flag-hB7-H4 were examined by western blotting. (G) The representative tumor images from Fig.6F are shown. (H) The representative images of IFN $\gamma$  ELISPOT in Fig.6G are shown.

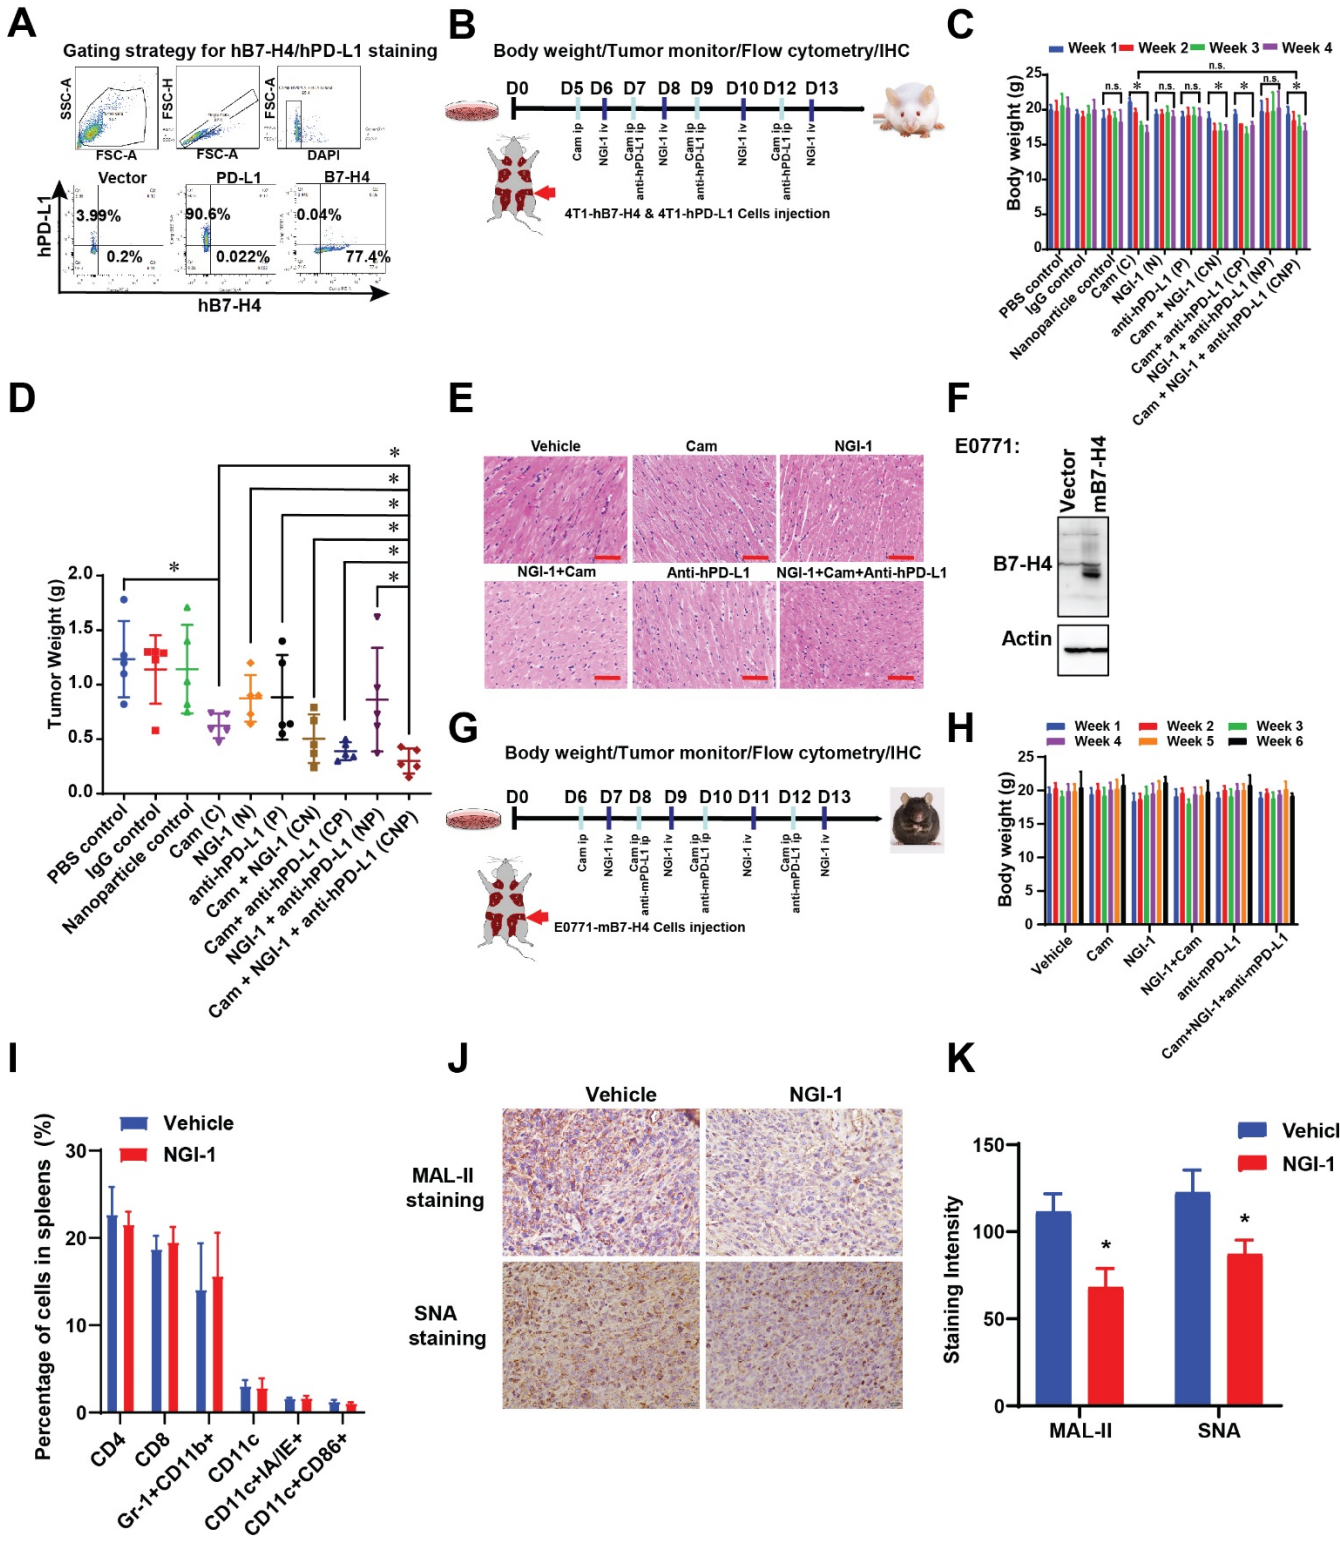

Supplementary Fig.8



**Supplementary Figure 8. The therapeutic efficacy of NGI-1, camsirubicin plus PD-L1 blockade in 4T1 and E0771 breast cancer orthotopic mouse models.**

**(A)** The gating strategy of B7-H4 or PD-L1 staining. 4T1 stably expressing hB7-H4 or hPD-L1 cells were stained with B7-H4 and PD-L1 followed by flow cytometry. **(B)** Schematic diagram of the therapeutic strategy of the combination of camsirubicin (25 mg/kg, ip.), NGI-1 (10 mg/kg, iv.) and PD-L1 antibody durvalumab (5 mg/kg, ip.) in Balb/C mice. **(C)** Body weight was monitored for 4 weeks after the injections of 4T1-B7-H4 and 4T1-PD-L1 cells. **(D)** On day 28, tumor weight was measured. **(E)** On day 28, mouse hearts from the indicated groups were subjected to H&E staining. The representative images are shown. Scale bar, 200  $\mu$ m. **(F)** The expression of mouse B7-H4 in E0771 and E0771-mB7-H4 cell lines. **(G)** Schematic diagram of the therapeutic strategy of the combination of camsirubicin (5 mg/kg, ip.) NGI-1 (10 mg/kg, iv.) and anti-mPD-L1 antibody (5 mg/kg, ip.) in C57BL/6 mice. **(H)** Body weight was monitored for 6 weeks after the injections of E0771-mB7-H4 cells. **(I)** Spleen cells from C57BL/6 mice were treated with 10  $\mu$ M NGI-1 for 24 hr followed by flow cytometry. The percentage of T cells, immature myeloid cells and dendritic cells were examined. n=3 mice per group. **(J)** NGI-1 inhibits both  $\alpha$ -2,3 and  $\alpha$ -2,6 linkage sialylation. SNA and MAL-II lectin staining were performed on the tumor tissues of the control group and NGI1 group of Balb/C mice on day 28. **(K)** The quantification of the staining intensity of MAL-II and SNA were shown.

## 2. Supplementary Table 1

**Summary for B7-H4 expression pattern in breast cancer lines.** The expression level of B7-H4 and PD-L1 in the 45 breast and 4 ovarian cancer cells were quantified by Image Lab.

| Cell lines    | ER | PR | HER2 | B7-H4 | PD-L1 |
|---------------|----|----|------|-------|-------|
| SK-BR-3       | N  | N  | Y    | 10.49 | 0     |
| HCC202        | N  | N  | Y    | 9.89  | 0     |
| MCF-7         | Y  | Y  | N    | 9.04  | 0     |
| BT474         | Y  | Y  | Y    | 5.514 | 0     |
| CAMA-1        | Y  | N  | N    | 4.885 | 0     |
| HCC2157       | N  | N  | N    | 4.87  | 0     |
| HCC1569       | N  | N  | Y    | 4.803 | 0     |
| ZR-75-30      | Y  | N  | Y    | 4.776 | 0     |
| ZR-75-1       | Y  | Y  | N    | 4.508 | 0     |
| Au-565        | N  | N  | Y    | 4.349 | 0     |
| MDA-MB-415    | Y  | N  | N    | 4.288 | 0     |
| HCC1428       | Y  | Y  | N    | 3.953 | 0     |
| MDA-MB-468    | N  | N  | N    | 3.232 | 0     |
| HCC1187       | N  | N  | N    | 2.574 | 0.77  |
| HCC1954       | N  | N  | Y    | 2.549 | 2.92  |
| HCC1599       | N  | N  | N    | 2.545 | 0     |
| MDA-MB-361    | Y  | N  | Y    | 2.439 | 0     |
| HCC1419       | Y  | N  | Y    | 2.256 | 0     |
| MDA-MB-175VII | Y  | N  | N    | 2.09  | 0     |
| HCC70         | N  | N  | N    | 1.948 | 2.81  |
| MDA-KB2       | N  | N  | N    | 1.934 | 0     |

|             |   |   |   |       |      |
|-------------|---|---|---|-------|------|
| HCC1937     | N | N | N | 1     | 1    |
| BT483       | Y | Y | N | 1     | 0    |
| HCC2218     | N | N | Y | 0.917 | 0    |
| UACC812     | Y | Y | Y | 0.702 | 0.25 |
| T47D        | Y | Y | N | 0.569 | 0.37 |
| HCC1500     | Y | N | N | 0.498 | 0.2  |
| MDA-MB-453  | N | N | N | 0.342 | 0    |
| HCC38       | N | N | N | 0.274 | 3.31 |
| Hs578Bst    | N | N | N | 0.248 | 4.28 |
| PA-1        | Y | N | N | 0.114 | 0    |
| MDA-MB-231  | N | N | N | 0     | 3.12 |
| HCC1806     | N | N | N | 0     | 1    |
| MDA-MB-436  | N | N | N | 0     | 1.14 |
| BT-549      | N | N | N | 0     | 2.52 |
| Du4475      | N | N | N | 0     | 0    |
| BT-20       | N | N | N | 0     | 3.34 |
| MDA-MB-157  | N | N | N | 0     | 0    |
| Hs578T      | N | N | N | 0     | 1.88 |
| HCC1395     | N | N | N | 0     | 0.2  |
| CaOV-3      | Y | N | N | 0     | 2.23 |
| SK-OV-3     | N | Y | Y | 0     | 1.2  |
| MDAMB134-VI | Y | N | Y | 0     | 0.58 |
| UACC893     | N | N | Y | 0     | 0.18 |
| SW626       | N | N | Y | 0     | 3.31 |
| MCF-10F     | N | N | N | 0     | 0.51 |

|                |          |          |          |          |             |
|----------------|----------|----------|----------|----------|-------------|
| <b>MCF-12A</b> | <b>Y</b> | <b>N</b> | <b>N</b> | <b>0</b> | <b>0.22</b> |
| <b>184-B5</b>  | <b>N</b> | <b>N</b> | <b>N</b> | <b>0</b> | <b>0.3</b>  |
| <b>MCF-10A</b> | <b>N</b> | <b>N</b> | <b>N</b> | <b>0</b> | <b>0.02</b> |

N, Negative; Y, Positive; ER, estrogen receptor; PR, Progesterone receptor; HER2, human epidermal growth factor receptor 2.
